# Supplementary material for: Accelerating First Principles Calculation of Multi-Component Alloy Steady-State Structure and Elastic Properties in Full Component Space
Source: MDPI journal article supplement (doi:10.3390/ma16186226), 2023-09-15
Supplement: s1 [file s1]

Table S1. Features for the phase parametric candidates of machine learning models.

| Parameter               | Calculation<br>Formula                                                                                                                            | Description                       | Parameter             | Calculation<br>Formula                                                              | Description                                                 |
|-------------------------|---------------------------------------------------------------------------------------------------------------------------------------------------|-----------------------------------|-----------------------|-------------------------------------------------------------------------------------|-------------------------------------------------------------|
| $\delta$                | $\sqrt{\sum_{i=1}^n C_i \left(1 - \frac{r_i}{r}\right)^2}$                                                                                        | Differences in<br>Atomic Radii    | $T_m$                 | $\sum_{i=1}^n C_i T_i$                                                              | The melting<br>point calculated<br>by the mixing<br>law     |
| $\chi$                  | $\sqrt{\sum_{i=1}^n C_i (\chi_i - \bar{\chi})^2}$                                                                                                 | Electronegativity<br>difference   | $a_m$                 | $\sum_{i=1}^n C_i a_i$                                                              | The lattice<br>constant<br>calculated by the<br>mixing rule |
| VEC                     | $\sum_{i=1}^n C_i \text{VEC}_i$                                                                                                                   | Valence electron<br>concentration | $\Delta T_m$          | $\sqrt{\sum_{i=1}^n C_i (T_i - \bar{T})^2}$                                         | Melting point<br>difference                                 |
| $\Delta H_{\text{mix}}$ | $\sum_{i=1, i \neq j}^n 4H_{ij} C_i C_j$                                                                                                          | Mixed Flame                       | $a$                   | $\sqrt{\sum_{i=1}^n C_i (a_i - \bar{a})^2}$                                         | Melting point<br>difference                                 |
| $\Delta S_{\text{mix}}$ | $-R \sum_{i=1}^n (C_i \ln C_i)$                                                                                                                   | Mixed Xiu                         | $\rho$                | $\sum_{i=1}^n C_i \rho_i$                                                           | Melting point<br>difference                                 |
| $\Lambda$               | $\Delta S_{\text{mix}} / (\delta * \delta)$                                                                                                       | $\Lambda$ parameter               | $\delta_{\text{con}}$ | $\sqrt{\sum_{i=1}^n C_i \left(1 - \frac{r_{\text{coni}}}{r_{\text{con}}}\right)^2}$ | Covalent radius<br>difference                               |
| $\gamma$                | $\frac{\sqrt{\frac{(r+r_{\text{min}})^2 - r^2}{(r+r_{\text{min}})^2}}}{\left(1 - \frac{(r+r_{\text{max}})^2 - r^2}{(r+r_{\text{max}})^2}\right)}$ | $\gamma$ parameter                | $I$                   | $\sum_{i=1}^n C_i I_i$                                                              | Ionization<br>energy                                        |

|           |                                               |                            |       |                           |                             |
|-----------|-----------------------------------------------|----------------------------|-------|---------------------------|-----------------------------|
| D. $\chi$ | $\sum_{i=1}^n \sum_{j=1, i \neq j}^n C_i C_j$ | Local                      | $A_r$ | $\sum_{i=1}^n C_i A_{ri}$ | Relative atomic             |
|           | $*  \chi_i - \chi_j $                         | electronegativity mismatch |       |                           | mass                        |
| $E_c$     | $\sum_{i=1}^n C_i * (Ec)_i$                   | Cohesion                   | $EA$  | $\sum_{i=1}^n C_i EA_i$   | Electronic<br>affinity work |
| $\lambda$ | $\frac{\Delta S_{mix}}{\delta^2}$             | Geometric<br>parameters    |       |                           |                             |

Table S2. Features for the mechanical parametric candidates of machine learning models.

| Parameter   | Calculation Formula                                                                                               | Description                        | Parameter  | Calculation Formula                                          | Description   |
|-------------|-------------------------------------------------------------------------------------------------------------------|------------------------------------|------------|--------------------------------------------------------------|---------------|
| The modulus |                                                                                                                   |                                    |            |                                                              |               |
| $\eta$      | $\sum_{i=1}^n \frac{C_i * \frac{2(G_i - G)}{G_i + G}}{1 + 0.5 * \left  C_i * \frac{2(G_i - G)}{G_i + G} \right }$ | in the                             | $\delta G$ | $\sqrt{\sum_{i=1}^n C_i * \left(1 - \frac{G_i}{G}\right)^2}$ | Difference in |
|             |                                                                                                                   | reinforcement model does not match |            |                                                              | shear modulus |
| D. r        | $\sum_{i=1}^n \sum_{j=1, i \neq j}^n C_i C_j *  r_i - r_j $                                                       | Partial size mismatch              | D. G       | $\sum_{i=1}^n \sum_{j=1, i \neq j}^n C_i C_j$                | Local modulus |
|             |                                                                                                                   |                                    |            | $*  G_i - G_j $                                              | mismatch      |
| A           | $G * \delta r * (1 + \mu)(1 - \mu)$                                                                               | Strengthen the                     | G          | $\sum_{i=1}^n C_i * G_i$                                     | Shear         |
|             |                                                                                                                   | energy term in the model           |            |                                                              | modulus       |

|       |                          |                                 |       |                          |                    |
|-------|--------------------------|---------------------------------|-------|--------------------------|--------------------|
| F     | $\frac{2G}{1 - \mu}$     | Peierls-<br>Nabarro factor      | E     | $\sum_{i=1}^n C_i * E_i$ | Young's<br>modulus |
| $\mu$ | $\frac{1}{2} E * \delta$ | Lattice<br>distortion<br>energy | $\nu$ | $\frac{E_i}{2G_i} - 1$   | Poisson's<br>ratio |

Table S3. The specifically designed parameters of Gaussian Processes models.

| Output          | Parameters                                                                                                                                                                                                                                                                                        |
|-----------------|---------------------------------------------------------------------------------------------------------------------------------------------------------------------------------------------------------------------------------------------------------------------------------------------------|
| System Energy   | 'Crossval', 'on'; 'Fitmethod', 'exact'; 'ComputationMethod', 'qr'; 'Sigma', 0.025; 'Regularization', 0.1; 'PredictMethod', 'exact'                                                                                                                                                                |
| Cell Volume     | 'Crossval', 'on'; 'Fitmethod', 'exact'; 'ComputationMethod', 'qr'; 'Sigma', 0.025; 'Regularization', 0.01; 'PredictMethod', 'exact'                                                                                                                                                               |
| Young's Modulus | 'Crossval', 'on'; 'Holdout', 0.3; 'Fitmethod', 'exact'; 'ComputationMethod', 'qr'; 'Standardize', true; 'BasisFunction', 'linear'; 'KernelFunction', 'ardsquaredexponential'; 'PredictMethod', 'exact'; 'ConstantSigma', true; 'Sigma', 0.02; 'Regularization', 0.06; 'BasisFunction', 'constant' |
| Bulk Modulus    | 'Crossval', 'on'; 'Holdout', 0.2; 'Fitmethod', 'sr'; 'ComputationMethod', 'qr'; 'Standardize', true; 'KernelFunction', 'ardsquaredexponential'; 'PredictMethod', 'sr'; 'ConstantSigma', true; 'Sigma', 0.003; 'BasisFunction', 'linear'                                                           |
| Shear Modulus   | 'Crossval', 'on'; 'Fitmethod', 'none'; 'KernelFunction', 'exponential'; 'BasisFunction', 'none'; 'ComputationMethod', 'v'; 'ConstantSigma', false; 'Regularization', 0.01; 'PredictMethod', 'sr'                                                                                                  |

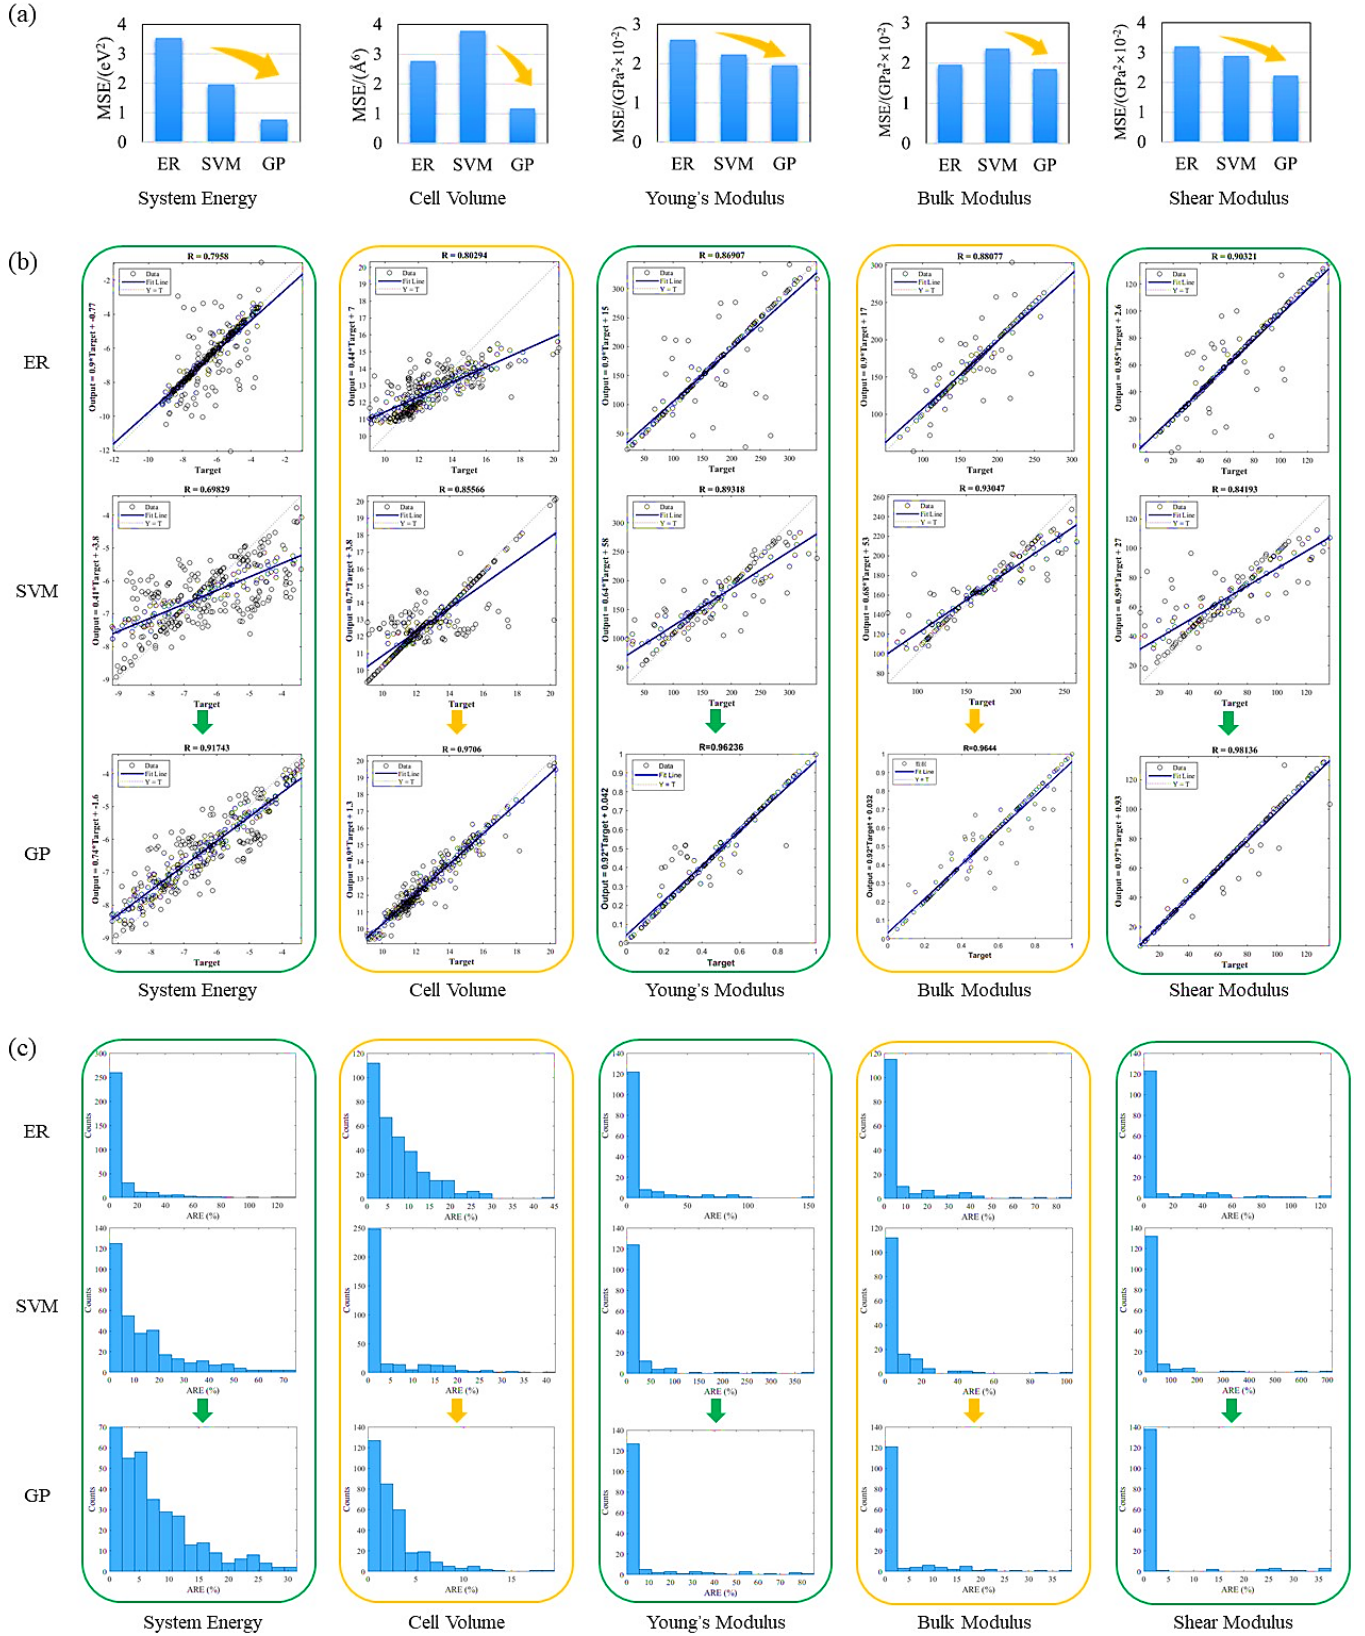

Figure S1. The (a) MSE, (b) regression figures and (c) ARE of five outputs ML models trained with ER, SVM and GP algorithms.
